# Supplementary figures and images for: Analysis of Morphological, Physiological, and Biochemical Traits of Salt Stress Tolerance in Asian Rice Cultivars at Seedling and Early Vegetative Stages
Source: MDPI journal article supplement (doi:10.3390/stresses3040049), 2023-10-17

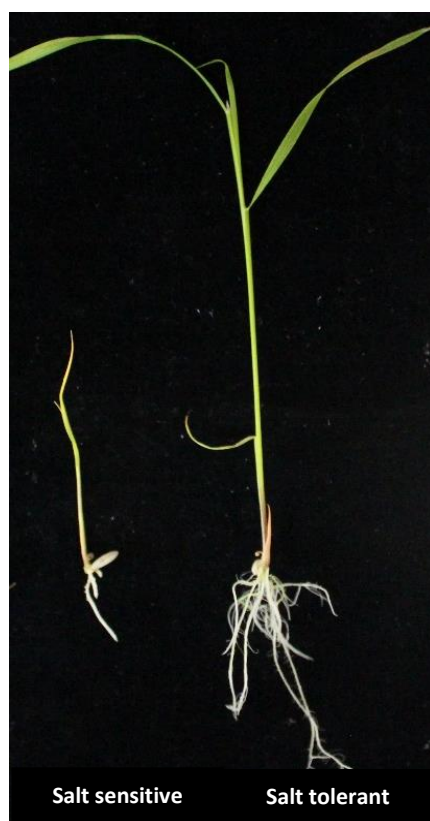

**Figure S1.** Salt tolerant and sensitive rice under salt treatment.

Supplement: s1 [file s1]
